# Supplementary material
Source: bioRxiv or medRxiv preprint supplement (https://www.biorxiv.org/highwire/filestream/108602/field_highwire_adjunct_files/6/178806-15.pdf)

**Supplementary Figure 15 : Genetic correlation QQ-plots between IDPs and 9 brain related conditions.** Quantile/quantile plots for genetic correlation p-values for 1,451 IDPs with each of 10 disease, personality or brain related conditions (see **Supplementary Table 10**). For each trait, the  $-\log_{10}$  p-values for each of the 1,451 IDPs (y-axis) are plotted against their expected value (x-axis). Only IDPs with heritability z-score  $> 4$  were included, and all netmat edge IDPs were excluded due to low levels of heritability. Expected p-values were calculated via simulation based on the raw correlation matrix of the IDPs.

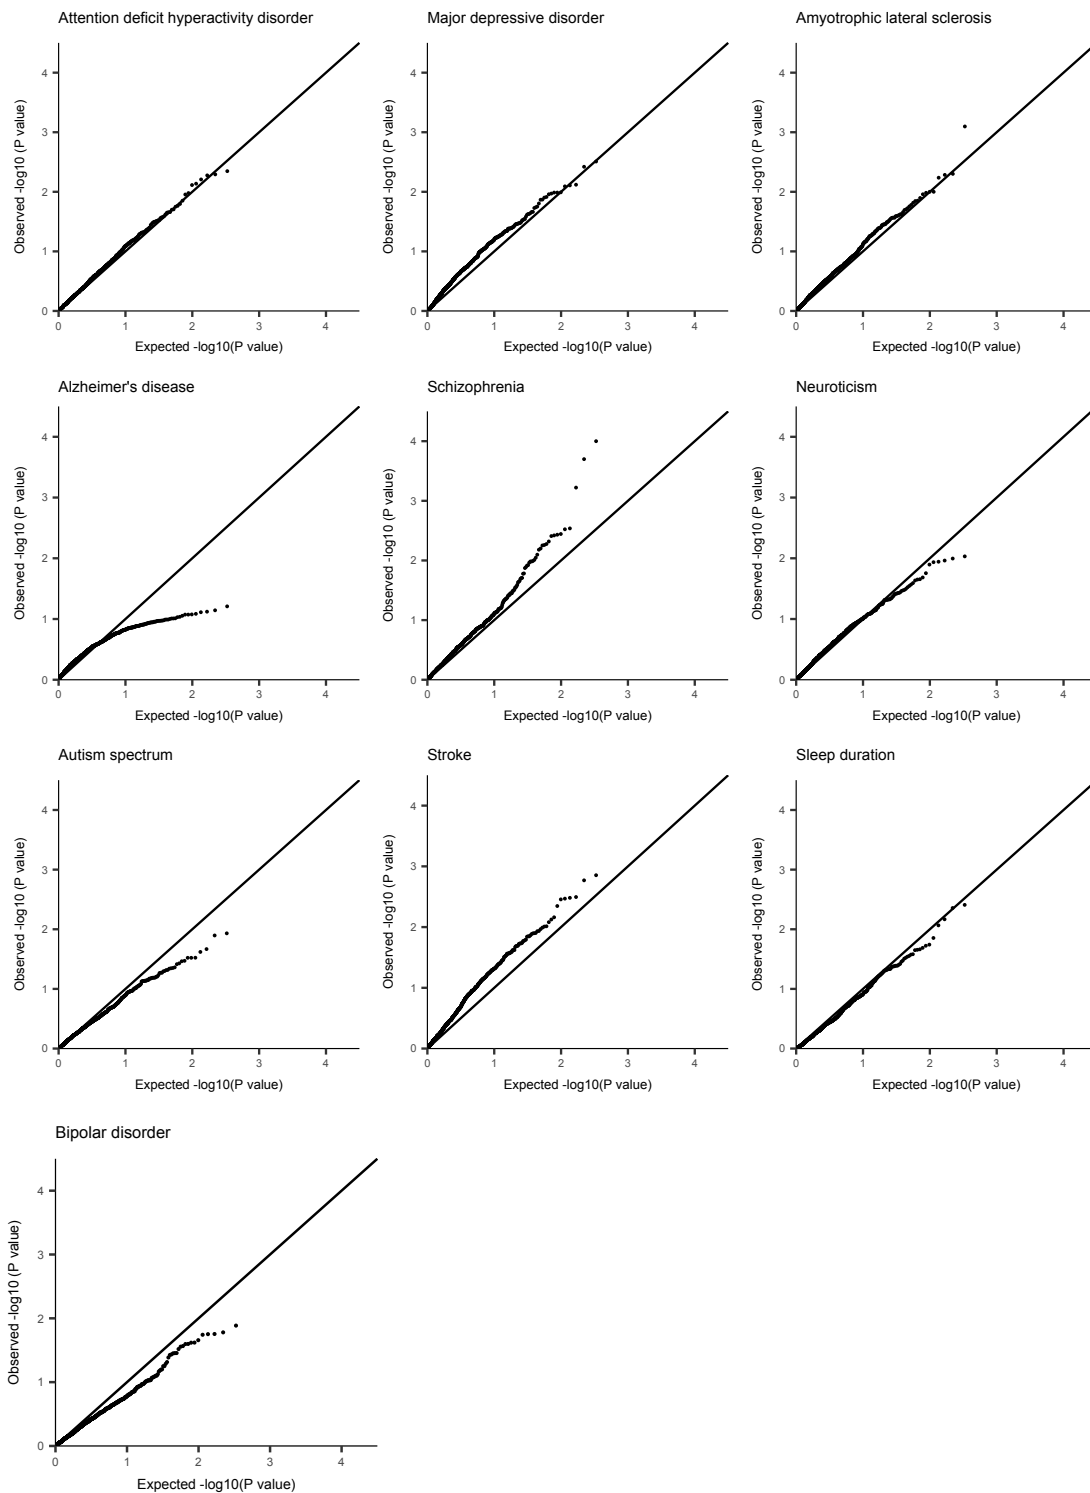

Supplement: Supplementary file [file 178806-15.pdf]
